# Supplementary material for: AI and cybersecurity: a risk society perspective
Source: Frontiers journal article supplement (doi:10.3389/fcomp.2024.1462250), 2024-10-30
Supplement: Table_1.docx [file Table_1.docx]

Supplementary Material

# Table S.M. 1. Voices in the Articles

| **Article number according to Table 1** | **Types of actors** |
| --- | --- |
| Article 1 | No voices are presented other than the author’s. |
| Article 2 | No voices are presented other than the authors’. |
| Article 3 | **Institutional voices:**   1. Police reports on School Principal Framed Using AI Voice Deepfake   **Organizations:**   1. Change Healthcare finally admitted to paying a ransom to the AlphV hackers [...] as part of its effort “to do all it could to protect patient data from disclosure.” |
| Article 4 | **Individually Named People:**   1. Anne Neuberger, deputy national security adviser for cyber and emerging technology on the White House’s National Security Council |
| Article 5 | **Individually Named People:**   1. Fannie Lou Hamer, civil rights icon |
| Article 6 | **Individually Named People:**   1. Jason Matheny, CEO and president of Rand Corporation; director of Intelligence Advanced Research Projects Activity, the US intelligence community's research agency; President Biden’s senior adviser on technology and national security issues. 2. Paul Mozur, York Times reporter |
| Article 7 | **Individually Named People:**   1. Jen Easterly, Director of Cybersecurity and Infrastructure Security Agency (CISA) 2. Alejandro Mayorkas, Secretary of Homeland Security |
| Article 8 | **Individual or Collective Anonymous Voices:**   1. Security researchers 2. Members of Congress and civil liberties groups   **Organizational Voices:**   1. US Cybersecurity Infrastructure Security Agency (CISA) |
| Article 9 | **Individually Named People:**   1. Vijay Bolina, chief information security officer at Google’s DeepMind artificial intelligence unit 2. Rich Harang, principal security architect focusing on AI systems at Nvidia 3. Niko Felix, OpenAI spokesperson 4. Caitlin Roulston, director of communications at Microsoft   **Organizational Voices:**   1. National Cybersecurity Center, a branch of GCHQ, the UK’s intelligence agency |
| Article 10 | **Individually Named People:**   1. Josiah Raiche, Vermont’s director of artificial intelligence 2. Sybil Gurney, Alameda County’s assistant chief information officer 3. Jim Loter, interim chief technology officer for the city of Seattle 4. Aaron Judy, chief of innovation and AI at Maricopa County Superior Court in Arizona 5. Alexandra Reeve Givens, president and CEO of the Center for Democracy and Technology 6. Albert Gehami, San Jose’s privacy officer   **Individual or Collective Anonymous Voices:**   1. State and city officials 2. Authors of policies on generative AI |
| Article 11 | **Individually Named People:**   1. Joe White, UK’s technology envoy to the US 2. UK prime minister Rishi Sunak 3. Yoshua Bengio, one of three “godfathers of AI” who won the highest award in computing, the Turing Award   **Individual or Collective Anonymous Voices:**   1. AI experts and executives in the UK 2. AI experts   **Institutional voices:**   1. The UK report [Frontier AI: capabilities and risks – discussion paper] |
| Article 12 | **Individually Named People:**   1. Bruce Reed, White House deputy chief of staff 2. Divyansh Kaushik, associate director at policy research group the Federation of American Scientists 3. Suresh Venkatasubramanian, director of the Center for Technological Responsibility, Reimagination, and Redesign at Brown University   **Institutional voices**   1. Biden's executive order on AI |
| Article 13 | **Individually Named People:**   1. Rob Joyce, NSA cybersecurity director |
| Article 14 | **Individually Named People:**   1. Daniel Kelley, independent cybersecurity researcher 2. Rakesh Krishnan, senior threat analyst at security firm Netenrich 3. Sergey Shykevich, threat intelligence group manager at security firm Check Point   **Organizational Voices:**   1. FBI (has warned that cybercriminals are looking at using generative AI in their work) 2. European law enforcement agency Europol   **Individual or Collective Anonymous Voices:**   1. Researchers at security firm Sophos |
| Article 15 | **Individually Named People:**   1. Aparna Pappu, vice president and general manager of Google Workspace 2. Neil Kumaran, product lead at Google 3. Patrick Harr, CEO of SlashNext, a messaging security company 4. Hatem Naguib, CEO of Barracuda Networks, an IT security firm |
| Article 16 | **Individually Named People:**   1. Alex Polyakov, CEO of security firm Adversa AI 2. Arvind Narayanan, professor of computer science at Princeton University 3. Alex Albert, University of Washington computer science student 4. Kai Greshake, cybersecurity researcher 5. Sahar Abdelnabi, researcher at the CISPA Helmholtz Center for Information Security in Germany 6. Daniel Fabian, red-team lead at Google 7. Leyla Hujer, CTO and cofounder of AI safety firm Preamble   **Individual or Collective Anonymous Voices:**   1. Research paper reported on by Vice’s Motherboard   **Organizational Voices:**   1. OpenAI spokesperson |
| Article 17 | **Individually Named People:**   1. Lina Khan, chair of the US Federal Trade Commission 2. Colnel Tucker Hamilton 3. Ann Stefanek, US Air Force Spokesperson   **Individual or Collective Anonymous Voices:**   1. Researchers 2. Staff at security firm Eclypsium 3. North Korean leaders   **Organizational Voices:**   1. Moscow-based cybersecurity firm Kaspersky 2. Russia’s Federal Security Service (FSB) 3. Apple 4. US Federal Trade Commission 5. US Air Force |
| Article 18 | **Institutional Voices:**   1. Advisory report from Europol |
| Article 19 | **Individual or Collective Anonymous Voices:**   1. Security experts   **Individually Named People:**   1. Caitlin Roulston, Microsoft director of communications 2. Sahar Abdelnabi, researcher at the CISPA Helmholtz Center for Information Security in Germany 3. Jose Selvi, executive principal security consultant at cybersecurity firm NCC Group 4. Tom Bonner, senior director of adversarial machine-learning research at AI security firm Hidden Layer 5. Johann Rehberger, security researcher and red team director 6. William Zhang, machine learning engineer at Robust Intelligence, an AI firm working on the safety and security of models 7. Niko Felix, spokesperson for OpenAI 8. Engineer Simon Willison |
| Article 20 | **Individual or Collective Anonymous Voices:**   1. Security researchers   **Individually Named People:**   1. Joseph Cox, Motherboard reporter 2. Lea Schönherr, security and adversarial machine learning researcher at the CISPA Helmholtz Center for Information Security in Germany 3. Crane Hassold, social engineering researcher and former digital behavior analyst for the FBI 4. Justin Hutchens, director of research and development at the cybersecurity firm Set Solutions |
| Article 21 | **Individually Named People:**   1. August Pfluger, US congressman 2. Marcus Sachs, deputy director for research at Auburn University’s McCrary Institute for Cyber and Critical Infrastructure Security 3. Mark Montgomery, former executive director of the Cyberspace Solarium Commission 4. Scott Algeier, executive director of IT-ISAC (information sharing and analysis center) 5. Brian Harrell, former assistant director for infrastructure security at the US Cybersecurity and Infrastructure Security Agency (CISA) 6. Allan Rodriguez, US Department of Agriculture (USDA) spokesperson 7. Eric Goldstein, CISA’s executive assistant director for cybersecurity |
| Article 22 | **Individually Named People:**   1. Emad Mostaque, CEO of Stability, a startup that has developed and open-sourced advanced image-generation technology 2. Gary Marcus, AI expert 3. Ashley Gabriel, Meta spokesperson 4. Alexandr Wang, CEO of Scale AI, a startup that carries out data labeling and machine-learning training for technology companies 5. Sean Gourley, CEO of Primer, a startup that sells AI tools for intelligence analysts 6. Clement Delangue, CEO of Hugging Face, a company that hosts open-source AI projects   **Collective Anonymous Voices:**   1. Experts |
| Article 23 | **Collective Anonymous Voices:**   1. Security experts |
| Article 24 | **Collective Anonymous Voices:**   1. Civil rights groups   **Organizational Voices:**   1. Management platform Okta |
| Article 25 | **Collective Anonymous Voices:**   1. US lawmakers |
| Article 26 | **Collective Anonymous Voices:**   1. Researchers at the University of Texas, Austin   **Organizational Voices:**   1. Internet infrastructure company Cloudflare   **Individual Anonymous Voices:**   1. A Turkish user who lost their life savings in a massive crypto theft |
| Article 27 | **Individually Named People:**   1. Dontae “BYTEME” Meyers, hacker 2. Michael Sellitto, head of geopolitics and security at Anthropic, an AI startup 3. Ram Shankar Sivu Kumar, Microsoft’s head of red-teaming 4. Rumman Chowdhury, founder of Humane Intelligence, a nonprofit developing ethical AI systems 5. Tyrance Billingsley II, founder of Black Tech Street, a nonprofit involved with Generative Red Team created by descendants of survivors of the 1921 Tulsa Race Massacre 6. Walter Lopez-Chavez, computer engineering student from Mercer University in Macon, Georgia 7. Genesis Guardado, 22-year-old data analytics student at Miami-Dade College |
| Article 28 | **Organizational Voices:**   1. Microsoft   **Individually Named People:**   1. Vasu Jakkal, Microsoft’s chief vice president of security 2. Chang Kawaguchi, Microsoft's vice president and AI security architect |
| Article 29 | **Individual Anonymous Voices:**   1. Lawmakers   **Individually Named People:**   1. Justice Elena Kagan 2. Soraya Chemaly, director of the Women’s Media Center Speech Project   **Organizational Voices:**   1. Phone monitoring app LetMeSpy |
| Article 30 | **Individually Named People:**   1. Meredith Whittaker, Signal Foundation president 2. Kim van Sparrentak, member of the European Parliament   **Individual Anonymous Voices:**   1. A Toyota spokesperson   **Organizational Voices:**   1. Toyota 2. Dragos, a leading industrial cybersecurity firm |
